# Supplementary material for: On the factors affecting the response time of synaptic ion-gated transistors
Source: Royal Society of Chemistry journal article supplement (doi:10.1039/d3tc00161j), 2023-01-01
Supplement: d3tc00161j1.pdf [file d3tc00161j1.pdf]

## Supplementary Information

### On the factors affecting the response time of synaptic ion-gated transistors

Ramin Karimi Azari\*<sup>a</sup>, Tian Lan<sup>a</sup>, Clara Santato\*<sup>a</sup>

<sup>a</sup> Engineering Physics, Polytechnique Montreal, 2500 Ch. Polytechnique, H3T 1J4, Montreal, QC, Canada

Corresponding authors: [ramin.karimi@polymtl.ca](mailto:ramin.karimi@polymtl.ca), [clara.santato@polymtl.ca](mailto:clara.santato@polymtl.ca)

## Morphology and structure of the P3HT films

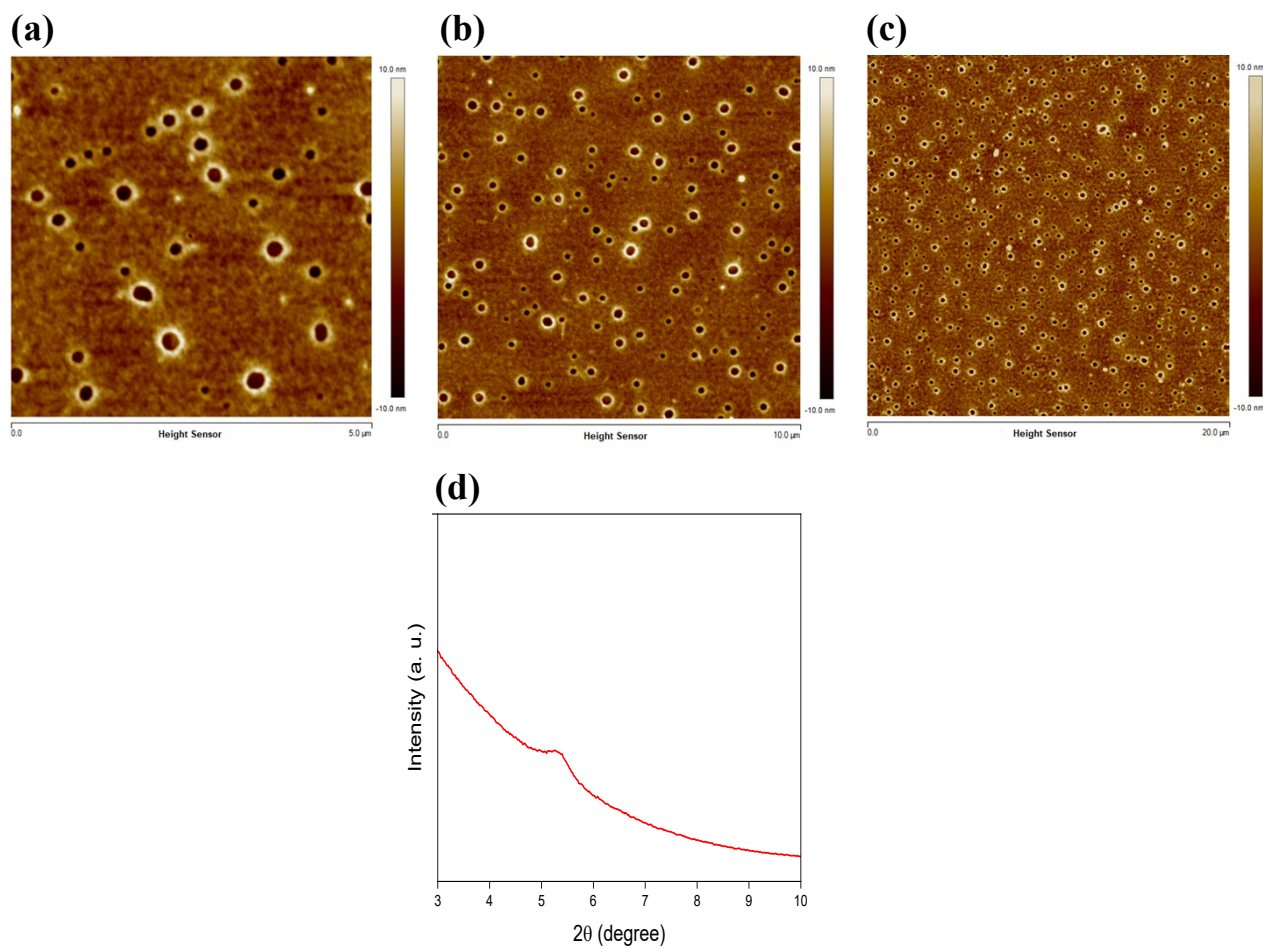

Figure S1 AFM height images of P3HT films with size: **a)** 5 μm×5 μm, **b)** 10 μm×10 μm, **c)** 20 μm×20 μm and **d)** XRD patterns of the P3HT films.

## Transfer and output characteristics of IGTs at different $V_{gs}$ scan rates

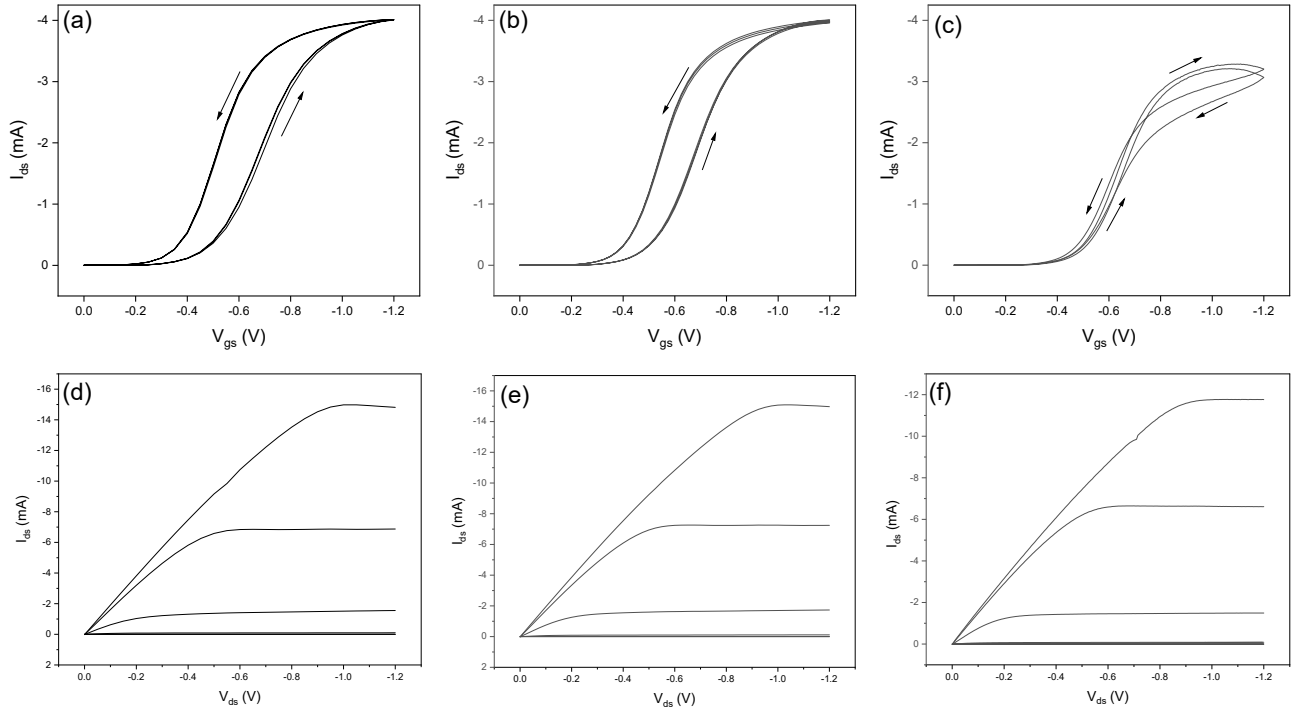

Figure S2 Transfer characteristics of [EMIM][TFSI]-gated P3HT transistors in the linear regime ( $V_{ds} = -0.2$  V (3 cycles)) at  $V_{gs}$  scan rates of: **a)** 50  $mVs^{-1}$ , **b)** 25  $mVs^{-1}$  and **c)** 5  $mVs^{-1}$ . Output characteristics with  $V_{gs} = 0, -0.2, -0.4, -0.6, -0.8, -1$  V with  $V_{ds}$  scan rates of: **d)** 50  $mVs^{-1}$ , **e)** 25  $mVs^{-1}$ , **f)** 5  $mVs^{-1}$ .

We calculated the charge carrier density ( $\rho$ ,  $cm^2$ ) and mobility ( $\mu$ ,  $cm^2V^{-1}s^{-1}$ ) in our P3HT channels from the transfer characteristics with  $V_{gs}$  sweeping rates of 5, 25, 50, and 100  $mVs^{-1}$  and  $V_{ds} = -0.2$  V (Table S1).

We obtained the charge carrier density from the equation:  $\rho = \frac{Q}{eA} = \frac{\int I_g dV_{gs}}{eAr_v}$ , where Q represents the amount of charge accumulated during the forward scan in the transfer curve (resulting from the integration of  $I_{gs}$  with  $V_{gs}$ ), e is the elementary charge, A is the interfaced area of the P3HT film, and the ionic media (4 mm $\times$ 9 mm), and  $r_v$  is the scan rate of  $V_{gs}$ .<sup>1</sup>

The charge carrier mobility,  $\mu$ , is obtained by  $\mu = \frac{L I_{ds}}{WQV_{ds}}$ .<sup>2</sup>

The ON/OFF ratio, calculated from the transfer curves, is the ratio between  $I_{ds}$  in the ON state and  $I_{ds}$  in the OFF state ( $I_{on}/I_{off}$ ), calculated for a fixed  $V_{gs}$ . The threshold voltage,  $V_{th}$ , was calculated using a linear extrapolation of the  $I_{ds} - V_{gs}$  curve, in the linear regime.<sup>3</sup>

Table S1 The values of threshold voltage and ON/OFF ratios of [EMIM][TFSI]-gated P3HT

| $V_{gs}$ scan rate<br>(mVs <sup>-1</sup> ) | ON/OFF<br>ratios  | Threshold<br>voltage (V) | Mobility<br>(cm <sup>2</sup> V <sup>-1</sup> s <sup>-1</sup> ) | Charge carrier<br>density (cm <sup>-2</sup> ) |
|--------------------------------------------|-------------------|--------------------------|----------------------------------------------------------------|-----------------------------------------------|
| 100                                        | $1.7 \times 10^3$ | $-0.47 \pm 0.03$         | $0.26 \pm 0.08$                                                | $1.3 \times 10^{15} \pm 0.5 \times 10^{15}$   |
| 50                                         | $2.6 \times 10^3$ | $-0.46 \pm 0.03$         | $0.19 \pm 0.06$                                                | $1.7 \times 10^{15} \pm 0.5 \times 10^{15}$   |
| 25                                         | $3.1 \times 10^3$ | $-0.45 \pm 0.03$         | $0.14 \pm 0.04$                                                | $2.1 \times 10^{15} \pm 0.5 \times 10^{15}$   |
| 5                                          | $5.8 \times 10^4$ | $-0.44 \pm 0.03$         | $0.06 \pm 0.01$                                                | $5.7 \times 10^{15} \pm 0.8 \times 10^{15}$   |

transistors ( $V_{ds} = -0.2$  V) at different  $V_{gs}$  scan rates: 100, 50, 25, and 5 mVs<sup>-1</sup>.

### Importance of the $V_{gs}$ sampling time on the measurement of the response time

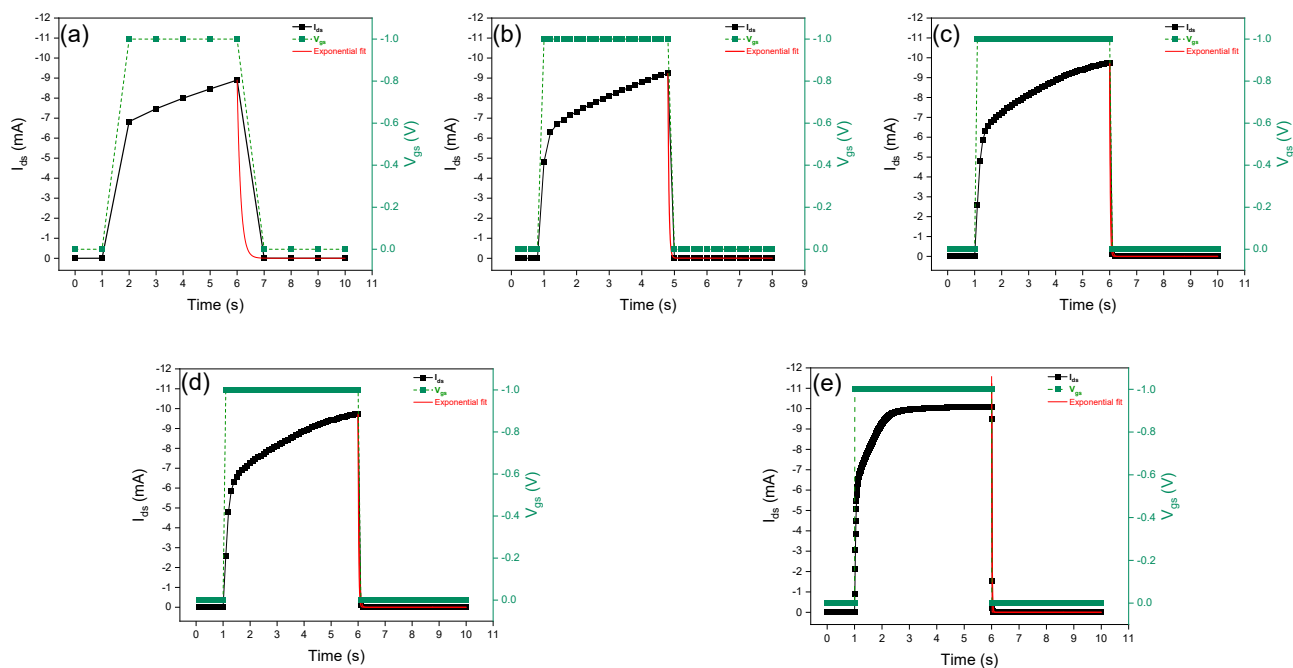

Figure S3 Transient  $I_{ds}$  characteristics of [EMIM][TFSI]-gated P3HT transistors at different  $V_{gs}$  pulse sampling times: **a)** 1 s, **b)** 250 ms, **c)** 100 ms, **d)** 50 ms, **e)** 10 ms in response to a single  $V_{gs} = -1$  V pulse, with  $V_{ds} = -0.8$  V; the duration of the  $V_{gs}$  pulse is 5 s.

### Fitting parameters for exponential fitting curves

R-square, also known as the coefficient of determination, measures a model's goodness of fit. The closer the fit is to the data points, the closer R-square will be to the value of 1.

We report fitting parameters for figures 3-5 in the tables below.

Table S2 R-square parameter values related to exponential fits used to estimate the response time of different numbers of  $V_{gs}$  pulses.

| Number of $V_{gs}$ pulses | 5 pulses | 10 pulses | 25 pulses |
|---------------------------|----------|-----------|-----------|
| R-square                  | 0.92     | 0.91      | 0.91      |

Table S3 R-square parameter values related to exponential fits used to estimate the response time of different duration time of pulse.

| Duration time of $V_{gs}$ pulse | 10 ms | 100 ms | 500 ms | 1 s  | 5 s  | 9 s  |
|---------------------------------|-------|--------|--------|------|------|------|
| R-square                        | 0.99  | 0.94   | 0.92   | 0.91 | 0.92 | 0.93 |

Table S4 R-square parameter values related to exponential fits used to estimate the response time of different frequencies of  $V_{gs}$  pulses.

| Frequency of $V_{gs}$ pulses | 1 Hz | 5 Hz | 10 Hz |
|------------------------------|------|------|-------|
| R-square                     | 0.92 | 0.94 | 0.96  |

Table S5 R-square parameter related to exponential fits used to estimate the response time of different  $V_{gs}$  pulse sampling times.

| $V_{gs}$ pulse sampling times | 10 ms | 25 ms | 50 ms | 100 ms | 250 ms | 500 ms | 1 s |
|-------------------------------|-------|-------|-------|--------|--------|--------|-----|
| R-square ( $V_{ds}=-0.6$ )    | 0.95  | 0.94  | 0.99  | 0.99   | 1      | 1      | 1   |
| R-square ( $V_{ds}=-0.8$ )    | 0.94  | 0.96  | 0.98  | 0.99   | 1      | 1      | 1   |

All R-square parameters are close to 1 and it shows a good fit between the exponential model and the associated decay curves.

### References

1. J. Sayago, F. Soavi, Y. Sivalingam, F. Cicoira and C. Santato, *Journal of Materials Chemistry C*, 2014, **2**, 5690-5694.
2. M. Zakrewsky, K. S. Lovejoy, T. L. Kern, T. E. Miller, V. Le, A. Nagy, A. M. Goumas, R. S. Iyer, R. E. Del Sesto and A. T. Koppisch, *Proceedings of the National Academy of Sciences*, 2014, **111**, 13313-13318.
3. Y. Na and F. S. Kim, *Chemistry of Materials*, 2019, **31**, 4759-4768.
